# Supplementary material
Source: ML conference proceedings conference paper supplement (https://openreview.net/forum?id=TtYJeYAhC4)
Supplement: supplementary_material [file appendix.pdf › appendix.pdf]

## A Efficient Implementation

In this section, we show how to make Algorithm 1 computationally tractable with negligible effects in the final regret bound. Indeed, Algorithm 1 is based on a confidence set  $\mathcal{C}_t(\delta)$  (Equation 7) that requires evaluating the norm of a difference of operators  $g_t$ , which is clearly computationally infeasible. In the following, we discuss how to make both steps of the algorithm computationally tractable. The resulting algorithm, Eff-GKB-UCB, is provided in Algorithm 2.

```

Input: Decision set  $\mathcal{X}$ , confidence level  $\delta$ , confidence sets  $\mathcal{D}_t(\delta)$ 
for  $t \in \llbracket T \rrbracket$  do
  /* Step 1: Efficient Maximum Likelihood Estimate */
   $\hat{\alpha}_t = \arg \min_{\alpha \in \mathbb{R}^{t-1}} \mathcal{L}_t(\langle \alpha, \mathbf{k}_t(\cdot) \rangle)$  (Equation 3)
  /* Step 2: Efficient Optimistic Decision Selection */
   $\mathbf{x}_t \in \arg \max_{\mathbf{x} \in \mathcal{X}} \max_{\alpha \in \mathbb{R}^{t-1}} \langle \alpha, \mathbf{k}_t(\mathbf{x}) \rangle$ 
  s.t.  $\mathcal{L}_t(\langle \alpha, \mathbf{k}_t(\cdot) \rangle) \leq \mathcal{L}_t(\langle \hat{\alpha}_t, \mathbf{k}_t(\cdot) \rangle) + D_t(\delta; \mathcal{H})$  (Equation 23)
  Play  $\mathbf{x}_t$  and observe  $y_t$ 
end

```

**Algorithm 2:** Eff-GKB-UCB.

**Efficient Maximum Likelihood Estimation.** Since function  $m$  is convex, loss function  $\mathcal{L}_t(f)$  is convex in  $f = \langle \alpha, \phi \rangle \in \mathcal{H}$  and, consequently, also in the parameter vector  $\alpha \in \mathbb{R}^N$ . However, optimizing over either  $f$  or  $\alpha$  is infeasible, being both infinite-dimensional. Nevertheless, thanks to the *generalized representer theorem* [27, Theorem 1], we can restrict the optimization to the functions of the form  $f(\cdot) = \sum_{s=1}^{t-1} \alpha_s k(\cdot, \mathbf{x}_s) = \langle \alpha, \mathbf{k}_t(\cdot) \rangle$ , where  $\alpha = (\alpha_s)_{s \in \llbracket t-1 \rrbracket}^\top$  and  $\mathbf{k}_t(\cdot) = (k(\cdot, \mathbf{x}_s))_{s \in \llbracket t-1 \rrbracket}^\top$ . This allows limiting the problem to the minimization of a convex function on a vector of  $t-1$  real variables  $\alpha \in \mathbb{R}^{t-1}$ .

**Efficient Optimistic Decision Selection.** To make the choice of the optimistic function, we propose a different (looser) confidence set based on the evaluation of the loss function only [2], defined for every round  $t \in \llbracket T \rrbracket$  and confidence  $\delta \in (0, 1)$ :<sup>9</sup>

$$\mathcal{D}_t(\delta) := \left\{ f \in \mathcal{H} : \mathcal{L}_t(f) - \mathcal{L}_t(\hat{f}_t) \leq D_t(\delta; \mathcal{H}) := (1 + 2R_s BK) B_t(\delta; \mathcal{H}) \right\}, \quad (22)$$

We prove in Lemma B.2 that the choice of the confidence radius ensures the inclusion property between the confidence sets  $\mathcal{C}_t(\delta) \subseteq \mathcal{D}_t(\delta)$ . Having fixed a decision  $\hat{\mathbf{x}} \in \mathcal{X}$ ,<sup>10</sup> the optimistic decision selection can be formulated, thanks to the generalized represented theorem [27] as the following constrained convex program:<sup>11</sup>

$$\begin{aligned} & \min_{\alpha \in \mathbb{R}^{t-1}} \quad - \langle \alpha, \mathbf{k}_t(\hat{\mathbf{x}}) \rangle \\ & \text{subject to} \quad \mathcal{L}_t(\langle \alpha, \mathbf{k}_t(\cdot) \rangle) \leq \mathcal{L}_t(\langle \hat{\alpha}_t, \mathbf{k}_t(\cdot) \rangle) + (1 + 2R_s BK) B_t(\delta; \mathcal{H}), \end{aligned} \quad (23)$$

where  $\hat{\alpha}_t$  are the parameters of the ML function computed in the previous step. Thus, the program has a linear objective function and a convex constraint, being  $\mathcal{L}_t(\langle \alpha, \mathbf{k}_t(\cdot) \rangle)$  convex in  $\alpha$ .

<sup>9</sup>Computing  $B_t(\delta; \mathcal{H})$  can be not straightforward for specific choices of kernel  $k$  and inverse link function  $\mu$ . In such a case, we can upper bound it using Lemma 5.1 by replacing  $\sup_{f \in \mathcal{H}} \log \det(\lambda^{-1} \tilde{V}_t(\lambda; f))$  with  $\max\{1, R_{\mu} \mathfrak{g}(\tau)^{-1}\} \log \det(\lambda^{-1} V_t(\lambda))$ . This has the effect of replacing the terms  $\tilde{\gamma}_T(\mathcal{H})$  with  $\max\{1, R_{\mu} \mathfrak{g}(\tau)^{-1}\} \gamma_T$  in the final regret bound.

<sup>10</sup>As customary in this literature [29, 5], we do not address the issue of optimizing over the decision space efficiently. This can be surely done efficiently when  $\mathcal{X}$  is finite. When  $\mathcal{X}$  is continuous, we can resort to a *discretization* based on the regularity properties of the kernel function, with a controllable effect on the final regret performances [21].

<sup>11</sup>Even if the represented theorem is formulated for unconstrained minimization, it admits costs functions that take  $+\infty$  as value [27]. Thus, we can convert a constrained minimization into an unconstrained one by bringing the constraint into the objective function and making it take value  $+\infty$  when the constraint is violated.

We now show that the choice of the new confidence set  $\mathcal{D}_t(\delta)$  does not degrade the dependence on the relevant quantities compared to using  $\mathcal{C}_t(\delta)$ .

**Theorem A.1** (Regret Bound of Eff-GKB-UCB). *Under Assumptions 3.1, 3.2, 3.3, and 3.4, GKB-UCB with confidence radius  $(1 + 2R_sBK)B_t(\delta; \mathcal{H})$  and  $\lambda > 0$ , for every  $\delta \in (0, 1)$ , with probability at least  $1 - \delta$ , suffers regret bounded as:  $R(\text{Eff-GKB-UCB}, T) = R_{\text{perm}}(T) + R_{\text{trans}}(T)$ , where:*

$$R_{\text{perm}}(T) \leq 4\sqrt{\max\{\mathbf{g}(\tau), \lambda^{-1}R_{\mu}K^2\}}(2 + 2R_sBK)\sqrt{\beta_T(\delta; \mathcal{H})}\left(\sqrt{\beta_T(\delta; \mathcal{H})} + 2\right)\sqrt{\tilde{\gamma}_T(f^*)}\sqrt{\frac{T}{\kappa_*}},$$

$$R_{\text{trans}}(T) \leq 8R_s(1 + R_{\mu}\kappa_{\mathcal{X}})\max\{\mathbf{g}(\tau), \lambda^{-1}R_{\mu}K^2\}(2 + 2R_sBK)^2\beta_T(\delta; \mathcal{H})\left(\sqrt{\beta_T(\delta; \mathcal{H})} + 2\right)^2\tilde{\gamma}_T(f^*).$$

The bounds of Theorem 7.2 and Theorem A.1 exhibit the same order dependence on the relevant quantities, but Theorem A.1 has a larger constant, approximately 3 times larger than Theorem 7.2 for  $R_{\text{perm}}(T)$  and 9 times larger for  $R_{\text{trans}}(T)$ .

## B Proofs

### B.1 Proofs of Section 5

**Lemma 5.1.** *Let  $\mathcal{H}$  be a RKHS induced by kernel  $k$ . Let  $t \in \mathbb{N}$  and let  $\mathbf{x}_1, \dots, \mathbf{x}_t \in \mathcal{X}$  be a sequence of decisions. It holds that  $\tilde{\Gamma}_t(\mathcal{H}) \leq \max\{1, R_{\mu}\mathbf{g}(\tau)^{-1}\}\Gamma_t$ .*

*Proof.* A direct application of Lemma C.5.  $\square$

### B.2 Proofs of Section 6

**Lemma B.1** (Freedman's Inequality). *Let  $(z_t)_{t \geq 1}$  be a real-valued martingale difference sequence adapted to the filtration  $\mathcal{F}_t$  such that  $z_t \leq R$  a.s. for all  $t \geq 1$ . Then, for every  $\lambda \in (0, 3/R)$  it holds that with probability at least  $1 - \delta$ :*

$$\forall t \geq 1 : \quad \sum_{s=1}^t z_s \leq \frac{\lambda}{2(1 - \lambda R/3)} \sum_{s=1}^t \mathbb{E}[z_s^2 | \mathcal{F}_{s-1}] + \frac{\log \delta^{-1}}{\lambda}. \quad (24)$$

This implies that for every  $\nu > 0$ , with probability at least  $1 - \delta$ :

$$\forall t \geq 1 : \quad \sum_{s=1}^t z_s \leq \nu \sqrt{2 \log \delta^{-1}} + \frac{R \log \delta^{-1}}{3} \quad \text{or} \quad \sum_{s=1}^t \mathbb{E}[z_s^2 | \mathcal{F}_{s-1}] > \nu^2. \quad (25)$$

*Proof.* Refer to Theorem 13.6 of [35].  $\square$

**Theorem 6.1** (A data-driven Freedman's inequality). *Let  $(z_t)_{t \geq 1}$  be a real-valued martingale difference sequence adapted to the filtration  $\mathcal{F}_t$  such that  $z_t \leq R$  a.s. for all  $t \geq 1$ . Let  $(v_t)_{t \geq 1}$  be a process predictable by the filtration  $\mathcal{F}_t$  such that for every  $t \geq 1$ , we have that  $\sum_{s=1}^t \mathbb{E}[z_s^2 | \mathcal{F}_{s-1}] \leq v_t$  a.s.. Then, for every  $\eta > 1$  and  $v_0 > 0$ , with probability at least  $1 - \delta$ , it holds that:*

$$\forall t \geq 1 : \quad \sum_{s=1}^t z_s \leq \sqrt{2 \max\{v_0, \eta v_t\} \log \frac{\pi^2(\widehat{\ell} + 1)^2}{6\delta}} + \frac{R}{3} \log \frac{\pi^2(\widehat{\ell} + 1)^2}{6\delta}, \quad (15)$$

where  $\widehat{\ell} = \max\{0, \lceil \log_{\eta}(v_t/v_0) \rceil\}$ .

*Proof.* The proof makes use of classical Freedman's inequality [11] combined with a *stitching* argument [13]. We start from the version of Freedman's inequality of Lemma B.1 taken from [35]:

$$\Pr \left( \exists t \geq 1 : \sum_{s=1}^t z_s > \nu \sqrt{2 \log \delta^{-1}} + \frac{R \log \delta^{-1}}{3}, \sum_{s=1}^t \mathbb{E}[z_s^2 | \mathcal{F}_{s-1}] \leq \nu^2 \right) \leq \delta. \quad (26)$$

489 Since  $v_t \geq \sum_{s=1}^t \mathbb{E}[z_s^2 | \mathcal{F}_{s-1}]$  a.s. for every  $t \geq 1$ , it immediately follows that:

$$\Pr \left( \exists t \geq 1 : \sum_{s=1}^t z_s > \nu \sqrt{2 \log \delta^{-1}} + \frac{R \log \delta^{-1}}{3}, v_t \leq \nu^2 \right) \leq \delta. \quad (27)$$

490 We now proceed by performing a stitching argument with a geometric grid over the values of  $\nu \geq 0$   
 491 defined as  $\{\eta^\ell v_0 : \ell \in \mathbb{N}\}$  for any choice of  $\eta > 1$  and  $v_0 > 0$ . Thus, we have:

$$\Pr \left( \exists \ell \in \mathbb{N}, \exists t \geq 1 : \sum_{s=1}^t z_s > \sqrt{2\eta^\ell v_0 \log \frac{\pi^2(\ell+1)^2}{6\delta}} + \frac{R}{3} \log \frac{\pi^2(\ell+1)^2}{6\delta}, v_t \leq \eta^\ell v_0 \right) \quad (28)$$

$$\leq \sum_{\ell \in \mathbb{N}} \Pr \left( \exists t \geq 1 : \sum_{s=1}^t z_s > \sqrt{2\eta^\ell v_0 \log \frac{\pi^2(\ell+1)^2}{6\delta}} + \frac{R}{3} \log \frac{\pi^2(\ell+1)^2}{6\delta}, v_t \leq \eta^\ell v_0 \right) \quad (29)$$

$$\leq \sum_{\ell \in \mathbb{N}} \frac{6\delta}{\pi^2(\ell+1)^2} \leq \delta, \quad (30)$$

492 where line (29) follows from a union bound, line (30) is an application of Equation (27) with  $\nu = \eta^\ell v_0$   
 493 and by observing that  $\sum_{\ell \in \mathbb{N}} \frac{1}{(\ell+1)^2} = \frac{\pi^2}{6}$ . Let us now consider the smallest value of  $\hat{\ell} \in \mathbb{N}$  such that  
 494  $v_t \leq \eta^{\hat{\ell}} v_0$ :

$$\hat{\ell} = \min \{ \ell \in \mathbb{N} : v_t \leq \eta^\ell v_0 \} = \max \left\{ 0, \left\lceil \log_\eta \frac{v_t}{v_0} \right\rceil \right\}. \quad (31)$$

495 For this value of  $\hat{\ell}$ , we have:

$$\eta^{\hat{\ell}} v_0 \leq \eta^{\max \{0, \lceil \log_\eta \frac{v_t}{v_0} \rceil\}} v_0 \leq \eta^{\max \{0, \log_\eta \frac{v_t}{v_0} + 1\}} v_0 \leq \max \{v_0, \eta v_t\}. \quad (32)$$

496 Finally, we prove the inequality:

$$\Pr \left( \exists t \geq 1 : \sum_{s=1}^t z_s > \sqrt{2 \max \{v_0, \eta v_t\} \log \frac{\pi^2(\hat{\ell}+1)^2}{6\delta}} + \frac{R}{3} \log \frac{\pi^2(\hat{\ell}+1)^2}{6\delta} \right) \quad (33)$$

$$\leq \Pr \left( \exists t \geq 1 : \sum_{s=1}^t z_s > \sqrt{2\eta^{\hat{\ell}} v_0 \log \frac{\pi^2(\hat{\ell}+1)^2}{6\delta}} + \frac{R}{3} \log \frac{\pi^2(\hat{\ell}+1)^2}{6\delta}, v_t \leq \eta^{\hat{\ell}} v_0 \right) \quad (34)$$

$$\leq \Pr \left( \exists \ell \in \mathbb{N}, \exists t \geq 1 : \sum_{s=1}^t z_s > \sqrt{2\eta^\ell v_0 \log \frac{\pi^2(\ell+1)^2}{6\delta}} + \frac{R}{3} \log \frac{\pi^2(\ell+1)^2}{6\delta}, v_t \leq \eta^\ell v_0 \right) \quad (35)$$

$$\leq \delta,$$

497 where line (34) follows from Equation (32) and line (35) from line (30).  $\square$

498 **Theorem 6.2** (Bernstein-Like Dimension-Free Self-Normalized Concentration). *Let  $(\mathbf{x}_t)_{t \geq 1}$  be a*  
 499 *discrete-time stochastic process predictable by the filtration  $\mathcal{F}_t$  and let  $(\epsilon_t)_{t \geq 1}$  be a real-valued*  
 500 *stochastic process adapted to the  $\mathcal{F}_t$  such that  $\mathbb{E}[\epsilon_t | \mathcal{F}_{t-1}] = 0$ ,  $\text{Var}[\epsilon_t | \mathcal{F}_{t-1}] = \sigma_t^2 = \sigma^2(\mathbf{x}_t)$ , and*  
 501  *$|\epsilon_t| \leq R$  a.s. for every  $t \geq 1$ . Let  $\phi : \mathcal{X} \rightarrow \mathbb{R}^N$  be the feature mapping induced by kernel  $k$  such that*  
 502  *$\|\phi(\mathbf{x})\|_2 \leq K$  for every  $\mathbf{x} \in \mathcal{X}$ . Let:*

$$S_t := \sum_{s=1}^{t-1} \epsilon_s \phi(\mathbf{x}_s), \quad \tilde{V}_t(\lambda) := \sum_{s=1}^{t-1} \sigma_s^2 \phi(\mathbf{x}_s) \phi(\mathbf{x}_s)^\top + \lambda I. \quad (16)$$

503 Then, for every  $\delta \in (0, 1)$  and  $t \geq 1$ , with probability at least  $1 - \delta$  it holds that:

$$\|S_t\|_{\tilde{V}_t^{-1}(\lambda)} \leq \left( \sqrt{73 \log \det(\lambda^{-1} \tilde{V}_t)} + \sqrt{3} \right) \sqrt{\log \frac{\pi^2(\rho+1)^2}{3\delta}} + \frac{3RK}{\sqrt{\lambda}} \log \frac{\pi^2(\rho+1)^2}{3\delta}, \quad (17)$$

504 where  $\rho = \max \left\{ 0, \left\lceil \log \left( \frac{8R^2 K^2 (t-1)^3}{\lambda} \log \left( 1 + \frac{K^2 R^2}{\lambda} \right) \right) \right\rceil \right\}$ .

505 *Proof.* The proof follows similar steps as [6, 36], using Theorem 6.1 as base inequality. For the  
 506 sake of this derivation, we will suppress the dependence on  $\lambda$ , simply writing  $\tilde{V}_t(\lambda) = \tilde{V}_t$ .<sup>12</sup> Let us  
 507 introduce the notation  $Z_t := \|S_t\|_{\tilde{V}_t^{-1}}$ ,  $w_t := \|\phi(\mathbf{x}_t)\|_{\tilde{V}_t^{-1}}$ , and  $\tilde{w}_t := \sigma_t \|\phi(\mathbf{x}_t)\|_{\tilde{V}_t^{-1}}$ . We denote  
 508 with  $K = \sup_{\mathbf{x} \in \mathcal{X}} \|\phi(\mathbf{x})\|_2$ . From the matrix inversion lemma [33], we have:

$$\tilde{V}_t^{-1} = \tilde{V}_{t-1}^{-1} - \frac{\tilde{V}_{t-1}^{-1} \phi(\mathbf{x}_{t-1}) \phi(\mathbf{x}_{t-1})^\top \tilde{V}_{t-1}^{-1} \sigma_{t-1}^2}{1 + \|\phi(\mathbf{x}_{t-1})\|_{\tilde{V}_{t-1}^{-1}}^2 \sigma_{t-1}^2} \quad (36)$$

$$= \tilde{V}_{t-1}^{-1} - \frac{\tilde{V}_{t-1}^{-1} \phi(\mathbf{x}_{t-1}) \phi(\mathbf{x}_{t-1})^\top \tilde{V}_{t-1}^{-1} \sigma_{t-1}^2}{1 + \tilde{w}_{t-1}^2}. \quad (37)$$

509 Let us decompose  $Z_t$ :

$$Z_t^2 := \|S_t\|_{\tilde{V}_t^{-1}}^2 = S_t^\top \tilde{V}_t^{-1} S_t \quad (38)$$

$$= (S_{t-1} + \epsilon_{t-1} \phi(\mathbf{x}_{t-1}))^\top \tilde{V}_t^{-1} (S_{t-1} + \epsilon_{t-1} \phi(\mathbf{x}_{t-1})) \quad (39)$$

$$= S_{t-1}^\top \tilde{V}_t^{-1} S_{t-1} + 2\epsilon_{t-1} \phi(\mathbf{x}_{t-1})^\top \tilde{V}_t^{-1} S_{t-1} + \epsilon_{t-1}^2 \phi(\mathbf{x}_{t-1})^\top \tilde{V}_t^{-1} \phi(\mathbf{x}_{t-1}) \quad (40)$$

$$\leq S_{t-1}^\top \tilde{V}_{t-1}^{-1} S_{t-1} + \underbrace{2\epsilon_{t-1} \phi(\mathbf{x}_{t-1})^\top \tilde{V}_t^{-1} S_{t-1}}_{(A)} + \underbrace{\epsilon_{t-1}^2 \phi(\mathbf{x}_{t-1})^\top \tilde{V}_t^{-1} \phi(\mathbf{x}_{t-1})}_{(B)}, \quad (41)$$

510 having exploited the fact that  $\tilde{V}_t \succeq \tilde{V}_{t-1}$ . We analyze terms (A) and (B) separately.

511 **Analysis of Term (A).** From the matrix inversion lemma, we have:

$$2\epsilon_{t-1} \phi(\mathbf{x}_{t-1})^\top \tilde{V}_t^{-1} S_{t-1} = 2\epsilon_{t-1} \left( \phi(\mathbf{x}_{t-1})^\top \tilde{V}_{t-1}^{-1} S_{t-1} \right. \quad (42)$$

$$\left. - \frac{\phi(\mathbf{x}_{t-1})^\top \tilde{V}_{t-1}^{-1} \phi(\mathbf{x}_{t-1}) \phi(\mathbf{x}_{t-1})^\top \tilde{V}_{t-1}^{-1} S_{t-1} \sigma_{t-1}^2}{1 + \tilde{w}_{t-1}^2} \right) \quad (43)$$

$$= 2\epsilon_{t-1} \left( \phi(\mathbf{x}_{t-1})^\top \tilde{V}_{t-1}^{-1} S_{t-1} - \frac{\tilde{w}_{t-1}^2}{1 + \tilde{w}_{t-1}^2} \phi(\mathbf{x}_{t-1})^\top \tilde{V}_{t-1}^{-1} S_{t-1} \right) \quad (44)$$

$$= 2\epsilon_{t-1} \frac{\phi(\mathbf{x}_{t-1})^\top \tilde{V}_{t-1}^{-1} S_{t-1}}{1 + \tilde{w}_{t-1}^2} =: \ell_t. \quad (45)$$

512 Consider now the event  $\mathcal{E}_t = \mathbb{1}\{0 \leq s \leq t : Z_s \leq \beta_t\}$ , being  $\beta_t$  a non-negative non-  
 513 decreasing predictable process, whose expression will be defined later. Furthermore, let us define  
 514  $\tilde{\beta}_t = \min \left\{ \beta_t, \frac{(t-1)RK}{\sqrt{\lambda}} \right\}$  which is non-decreasing as well. Under event  $\mathcal{E}_t$ , we know that  $Z_s \leq \tilde{\beta}_t$   
 515 thanks to Lemma C.7. Under  $\mathcal{E}_t$ , we bound the maximum value and the variance of  $\ell_t$ . Let us start  
 516 with the maximum value:

$$\ell_t \mathcal{E}_t \leq |\ell_t \mathcal{E}_t| \leq \left| 2\epsilon_{t-1} \frac{\phi(\mathbf{x}_{t-1})^\top \tilde{V}_{t-1}^{-1} S_{t-1}}{1 + \tilde{w}_{t-1}^2} \mathcal{E}_t \right| \quad (46)$$

<sup>12</sup>With little abuse, we will ignore the fact that  $\phi$  is an infinite-dimensional feature mapping to avoid excessive technicalities. We refer the interested reader to [32] that shows that all passages we do are indeed legal when  $\phi$  is the feature mapping induced by an RKHS.

$$\leq \frac{2R}{1 + \tilde{w}_{t-1}^2} \|\phi(\mathbf{x}_{t-1})\|_{\tilde{V}_{t-1}^{-1}} \|S_{t-1}\|_{\tilde{V}_{t-1}^{-1}} \mathcal{E}_t \quad (47)$$

$$\leq \frac{2R \|\phi(\mathbf{x}_{t-1})\|_{\lambda^{-1}I} \beta_{t-1}}{1 + \tilde{w}_{t-1}^2} \quad (48)$$

$$\leq \frac{2RK}{\sqrt{\lambda}} \beta_t, \quad (49)$$

517 where line (47) follows from the application of Cauchy-Schwarz inequality and recalling that  $|\epsilon_{t-1}| \leq$   
 518  $R$  a.s., line (48) is obtained by observing that  $\tilde{V}_{t-1} \succeq \lambda I$  and by exploiting event  $\mathcal{E}_t$ , and line (49)  
 519 comes from the bound on  $\|\phi(\mathbf{x}_{t-1})\| \leq K$  and the monotonicity of  $\beta_t$ . Let us move to the variance,  
 520 recalling that  $\ell_t$  is zero mean, i.e.,  $\mathbb{E}[\ell_t | \mathcal{F}_{t-1}] = 0$ :

$$\mathbb{E}[\ell_t^2 | \mathcal{F}_{t-1}] = \mathbb{E} \left[ \left( 2\epsilon_{t-1} \frac{\phi(\mathbf{x}_{t-1})^\top \tilde{V}_{t-1}^{-1} S_{t-1}}{1 + \tilde{w}_{t-1}^2} \right)^2 \mathcal{E}_t | \mathcal{F}_{t-1} \right] \quad (50)$$

$$\leq \frac{4\sigma_{t-1}^2 \|\phi(\mathbf{x}_{t-1})\|_{\tilde{V}_{t-1}^{-1}}^2 \|S_{t-1}\|_{\tilde{V}_{t-1}^{-1}}^2}{(1 + \tilde{w}_{t-1}^2)^2} \mathcal{E}_t \quad (51)$$

$$\leq \left( \frac{2\tilde{w}_{t-1}}{1 + \tilde{w}_{t-1}^2} \right)^2 \tilde{\beta}_{t-1}^2 \quad (52)$$

$$\leq \min\{1, 2\tilde{w}_{t-1}\}^2 \tilde{\beta}_{t-1}^2, \quad (53)$$

521 where line (51) follows from Cauchy-Schwarz inequality and recalling that  $\mathbb{E}[\epsilon_{t-1} | \mathcal{F}_{t-1}] = \sigma_{t-1}^2$ ,  
 522 line (53) follows from the inequality  $\frac{2x}{1+x^2} \leq \min\{1, 2x\}$  for  $x \geq 0$ . Summing, we obtain:

$$\sum_{s=1}^t \mathbb{E}[\ell_s^2 | \mathcal{F}_{s-1}] \leq \sum_{s=1}^t \min\{1, 2\tilde{w}_{s-1}\}^2 \tilde{\beta}_{s-1}^2 \quad (54)$$

$$\leq 4\tilde{\beta}_t^2 \sum_{s=1}^t \min\{1, \tilde{w}_{s-1}\}^2, \quad (55)$$

523 where we bounded  $\tilde{\beta}_{t-1} \leq \tilde{\beta}_t$  and  $\min\{1, 2\tilde{w}_{s-1}\}^2 \leq 4 \min\{1, \tilde{w}_{s-1}\}^2$ . From a standard elliptical  
 524 potential lemma (Lemma C.6 with  $M = 1$ ), we obtain:

$$\sum_{s=1}^t \min\{1, \tilde{w}_{s-1}\}^2 \leq 2 \log \frac{\det(\tilde{V}_t)}{\det(\tilde{V}_0)} = 2 \log \det(\lambda^{-1} \tilde{V}_t), \quad (56)$$

525 where  $\tilde{V}_0 = \lambda I$ . By Theorem 6.1, setting  $\eta = e$ ,  $v_0 = 1$ ,  $v_t = 8\beta_t^2 \log \det(\lambda^{-1} \tilde{V}_t)$ , we have that  
 526 with probability at least  $1 - \delta$ :

$$\forall t \geq 1 : \sum_{s=1}^t \ell_s \leq \sqrt{2 \max\left\{1, 8e\beta_t^2 \log \det(\lambda^{-1} \tilde{V}_t)\right\} \log \frac{\pi^2(\hat{\rho} + 1)^2}{6\delta}} + \frac{2RK}{3\sqrt{\lambda}} \beta_t \log \frac{\pi^2(\hat{\rho} + 1)^2}{6\delta}, \quad (57)$$

527 with  $\hat{\rho} = \max\left\{0, \left\lceil \log \left( 8 \frac{(t-1)^2 R^2 K^2}{\lambda} \log \det(\lambda^{-1} \tilde{V}_t) \right) \right\rceil \right\}$ , having bounded  $\tilde{\beta}_t \leq \beta_t$  in the inequal-  
 528 ity and  $\tilde{\beta}_t \leq \frac{(t-1)RK}{\sqrt{\lambda}}$  in the expression of  $\hat{\rho}$ .

529 **Analysis of Term (B).** We proceed again by using the matrix inversion lemma:

$$\epsilon_{t-1}^2 \phi(\mathbf{x}_{t-1})^\top \tilde{V}_t^{-1} \phi(\mathbf{x}_{t-1}) = \epsilon_{t-1}^2 \left( \phi(\mathbf{x}_{t-1})^\top \tilde{V}_{t-1}^{-1} \phi(\mathbf{x}_{t-1}) \right) \quad (58)$$

$$- \frac{\phi(\mathbf{x}_{t-1})^\top \tilde{V}_{t-1}^{-1} \phi(\mathbf{x}_{t-1}) \phi(\mathbf{x}_{t-1})^\top \tilde{V}_{t-1}^{-1} \phi(\mathbf{x}_{t-1}) \sigma_{t-1}^2}{1 + \tilde{w}_{t-1}^2} \Big) \quad (59)$$

$$= \frac{\epsilon_{t-1}^2 \|\phi(\mathbf{x}_{t-1})\|_{\tilde{V}_{t-1}^{-1}}^2}{1 + \tilde{w}_{t-1}^2}. \quad (60)$$

Let us define:

$$\ell_t := \frac{\epsilon_{t-1}^2 \|\phi(\mathbf{x}_{t-1})\|_{\tilde{V}_{t-1}^{-1}}^2}{1 + \tilde{w}_{t-1}^2} - \mathbb{E} \left[ \frac{\epsilon_{t-1}^2 \|\phi(\mathbf{x}_{t-1})\|_{\tilde{V}_{t-1}^{-1}}^2}{1 + \tilde{w}_{t-1}^2} \middle| \mathcal{F}_{t-1} \right].$$

530 Let us start bounding the maximum value:

$$\ell_t \leq \frac{\epsilon_{t-1}^2 \|\phi(\mathbf{x}_{t-1})\|_{\tilde{V}_{t-1}^{-1}}^2}{1 + \tilde{w}_{t-1}^2} \leq \frac{R^2 K^2}{\lambda}, \quad (61)$$

531 where we bounded  $\|\phi(\mathbf{x}_{t-1})\|_{\tilde{V}_{t-1}^{-1}}^2 \leq \|\phi(\mathbf{x}_{t-1})\|_{\lambda^{-1}I}^2 \leq \frac{K^2}{\lambda}$ .

532 Concerning the variance, we have:

$$\mathbb{V}\text{ar}[\ell_t | \mathcal{F}_{t-1}] = \mathbb{V}\text{ar} \left[ \frac{\epsilon_{t-1}^2 \|\phi(\mathbf{x}_{t-1})\|_{\tilde{V}_{t-1}^{-1}}^2}{1 + \tilde{w}_{t-1}^2} \middle| \mathcal{F}_{t-1} \right] \quad (62)$$

$$\leq \mathbb{E} \left[ \left( \frac{\epsilon_{t-1}^2 \|\phi(\mathbf{x}_{t-1})\|_{\tilde{V}_{t-1}^{-1}}^2}{1 + \tilde{w}_{t-1}^2} \right)^2 \middle| \mathcal{F}_{t-1} \right] \quad (63)$$

$$\leq \frac{R^2 K^2}{\lambda} \mathbb{E} \left[ \frac{\epsilon_{t-1}^2 \|\phi(\mathbf{x}_{t-1})\|_{\tilde{V}_{t-1}^{-1}}^2}{1 + \tilde{w}_{t-1}^2} \middle| \mathcal{F}_{t-1} \right] \quad (64)$$

$$= \frac{R^2 K^2}{\lambda} \frac{\sigma_{t-1}^2 \|\phi(\mathbf{x}_{t-1})\|_{\tilde{V}_{t-1}^{-1}}^2}{1 + \tilde{w}_{t-1}^2} \quad (65)$$

$$= \frac{R^2 K^2}{\lambda} \frac{\tilde{w}_{t-1}^2}{1 + \tilde{w}_{t-1}^2} \quad (66)$$

$$\leq \frac{R^2 K^2}{\lambda} \min\{1, \tilde{w}_{t-1}\}^2, \quad (67)$$

533 where line (64) derives from applying Equation (61), line (67) follows from the inequality  $\frac{x}{1+x} \leq$   
 534  $\min\{1, x\}$ . Summing and applying the elliptic potential lemma (Lemma C.6 with  $M = 1$ ), we have:

$$\sum_{s=1}^t \mathbb{V}\text{ar}[\ell_s | \mathcal{F}_{s-1}] \leq \frac{R^2 K^2}{\lambda} \sum_{s=1}^t \min\{1, \tilde{w}_{s-1}\}^2 \leq \frac{2R^2 K^2}{\lambda} \log \det(\lambda^{-1} \tilde{V}_t). \quad (68)$$

535 Furthermore, following the same steps from Equation (64), we obtain:

$$\sum_{s=1}^t \mathbb{E}[\ell_s | \mathcal{F}_{s-1}] = \sum_{s=1}^t \mathbb{E} \left[ \frac{\epsilon_{t-1}^2 \|\phi(\mathbf{x}_{t-1})\|_{\tilde{V}_{t-1}^{-1}}^2}{1 + \tilde{w}_{t-1}^2} \middle| \mathcal{F}_{t-1} \right] \leq 2 \log \det(\lambda^{-1} \tilde{V}_t). \quad (69)$$

536 We now apply Theorem 6.1, setting  $\eta = e$ ,  $v_0 = 1$ ,  $v_t = \frac{2R^2 K^2}{\lambda} \log \det(\lambda^{-1} \tilde{V}_t)$ , we have that with  
 537 probability at least  $1 - \delta$ :

$$\forall t \geq 1 : \sum_{s=1}^t \frac{\epsilon_{t-1}^2 \|\phi(\mathbf{x}_{t-1})\|_{\tilde{V}_{t-1}^{-1}}^2}{1 + \tilde{w}_{t-1}^2} \leq 2 \log \det(\lambda^{-1} \tilde{V}_t) \quad (70)$$

$$+ \sqrt{2 \max \left\{ 1, \frac{2eR^2K^2}{\lambda} \log \det(\lambda^{-1}\tilde{V}_t) \right\} \log \frac{\pi^2(\tilde{\rho}+1)^2}{6\delta}} + \frac{R^2K^2}{3\lambda} \log \frac{\pi^2(\tilde{\rho}+1)^2}{6\delta}, \quad (71)$$

538 with  $\tilde{\rho} = \max \left\{ 0, \left\lceil \log \left( \frac{2R^2K^2}{\lambda} \log \det(\lambda^{-1}\tilde{V}_t) \right) \right\rceil \right\}$ .

539 **Putting All Together.** We observe that  $\hat{\rho} \geq \tilde{\rho}$ , and that  $\log \det(\lambda^{-1}\tilde{V}_t) \leq (t-1) \log \left( 1 + \frac{R^2K^2}{\lambda} \right)$   
 540 from Lemma C.7, we define  $\rho := \max \left\{ 0, \left\lceil \log \left( \frac{8R^2K^2(t-1)^3}{\lambda} \log \left( 1 + \frac{K^2R^2}{\lambda} \right) \right) \right\rceil \right\}$ . Putting to-  
 541 gether the two bounds, we have to find  $\beta_t$  in order to satisfy the following condition:

$$(A) + (B) \leq \sqrt{2 \max \left\{ 1, 8e\beta_t^2 \log \det(\lambda^{-1}\tilde{V}_t) \right\} \log \frac{\pi^2(\rho+1)^2}{6\delta}} + \frac{2RK}{3\sqrt{\lambda}} \beta_t \log \frac{\pi^2(\rho+1)^2}{6\delta} \quad (72)$$

$$+ 2 \log \det(\lambda^{-1}\tilde{V}_t) + \sqrt{2 \max \left\{ 1, \frac{2eR^2K^2}{\lambda} \log \det(\lambda^{-1}\tilde{V}_t) \right\} \log \frac{\pi^2(\rho+1)^2}{6\delta}} \quad (73)$$

$$+ \frac{R^2K^2}{3\lambda} \log \frac{\pi^2(\rho+1)^2}{6\delta} \leq \beta_t^2. \quad (74)$$

542 We proceed by bounding the maxima in the left-hand-side as  $\max\{a, b\} \leq a + b$  for  $a, b \geq 0$  and  
 543 using the subadditivity of the square root to get a stricter condition:

$$\sqrt{2 \log \frac{\pi^2(\rho+1)^2}{6\delta}} + \sqrt{16e\beta_t^2 \log \det(\lambda^{-1}\tilde{V}_t) \log \frac{\pi^2(\rho+1)^2}{6\delta}} + \frac{2RK}{3\sqrt{\lambda}} \beta_t \log \frac{\pi^2(\rho+1)^2}{6\delta} \quad (75)$$

$$+ 2 \log \det(\lambda^{-1}\tilde{V}_t) + \sqrt{2 \log \frac{\pi^2(\rho+1)^2}{6\delta}} + \sqrt{\frac{4eR^2K^2}{\lambda} \log \det(\lambda^{-1}\tilde{V}_t) \log \frac{\pi^2(\rho+1)^2}{6\delta}} \quad (76)$$

$$+ \frac{R^2K^2}{3\lambda} \log \frac{\pi^2(\rho+1)^2}{6\delta} \leq \beta_t^2. \quad (77)$$

544 This is a second-degree inequality in the variable  $\beta_t$  and, thus, we have to find the minimum value  
 545 of  $\beta_t$  fulfilling such an inequality. Using the polynomial inequality of Proposition 7 of [2] (i.e.,  
 546  $x^2 \leq bx + c = 0 \implies x \leq b + \sqrt{c}$  when  $b, c \geq 0$ ), we have:

$$\beta_t \leq \sqrt{16e \log \det(\lambda^{-1}\tilde{V}_t) \log \frac{\pi^2(\rho+1)^2}{6\delta}} + \frac{2RK}{3\sqrt{\lambda}} \log \frac{\pi^2(\rho+1)^2}{6\delta} \quad (78)$$

$$+ \left( 2\sqrt{2 \log \frac{\pi^2(\rho+1)^2}{6\delta}} + 2 \log \det(\lambda^{-1}\tilde{V}_t) \right) \quad (79)$$

$$+ \sqrt{\frac{4eR^2K^2}{\lambda} \log \det(\lambda^{-1}\tilde{V}_t) \log \frac{\pi^2(\rho+1)^2}{6\delta}} + \frac{R^2K^2}{3\lambda} \log \frac{\pi^2(\rho+1)^2}{6\delta} \Big)^{\frac{1}{2}} \quad (80)$$

$$\leq \left( (\sqrt{16e} + \sqrt{2}) \sqrt{\log \det(\lambda^{-1}\tilde{V}_t)} + \sqrt{2\sqrt{2}} \right) \sqrt{\log \frac{\pi^2(\rho+1)^2}{6\delta}} \quad (81)$$

$$+ \left( \frac{2}{3} + \frac{1}{\sqrt{3}} \right) \frac{RK}{\sqrt{\lambda}} \log \frac{\pi^2(\rho+1)^2}{6\delta} \quad (82)$$

$$+ \left( \frac{4eR^2K^2}{\lambda} \log \det(\lambda^{-1}\tilde{V}_t) \log \frac{\pi^2(\rho+1)^2}{6\delta} \right)^{\frac{1}{4}} \quad (83)$$

$$\leq \left( \left( \sqrt{16e} + \sqrt{2} + \frac{1}{2} \right) \sqrt{\log \det(\lambda^{-1}\tilde{V}_t)} + \sqrt{2\sqrt{2}} \right) \sqrt{\log \frac{\pi^2(\rho+1)^2}{6\delta}} \quad (84)$$

$$+ \left( \frac{2}{3} + \frac{1}{\sqrt{3}} + \sqrt{e} \right) \frac{RK}{\sqrt{\lambda}} \log \frac{\pi^2(\rho+1)^2}{6\delta}, \quad (85)$$

547 where line (82) follows from the subadditivity of the square root and recalling that  $\log \frac{6(\rho+1)^2}{\pi^2\delta} \geq 1$   
 548 for  $t \geq 1$ , to get line (85), we apply Young's inequality for products as  $ab \leq a^2/2 + b^2/2$  for  $a, b \geq 0$   
 549 to get:

$$\left( \frac{4eR^2K^2}{\lambda} \log \det(\lambda^{-1}\tilde{V}_t) \log \frac{\pi^2(\rho+1)^2}{6\delta} \right)^{\frac{1}{4}} \leq \sqrt{e} \frac{RK}{\sqrt{\lambda}} \sqrt{\log \frac{\pi^2(\rho+1)^2}{6\delta}} + \frac{1}{2} \sqrt{\log \det(\lambda^{-1}\tilde{V}_t)}. \quad (86)$$

550 To obtain more manageable constant, we write:

$$\beta_t \leq \left( \sqrt{73 \log \det(\lambda^{-1}\tilde{V}_t)} + \sqrt{3} \right) \sqrt{\log \frac{\pi^2(\rho+1)^2}{6\delta}} + \frac{3RK}{\sqrt{\lambda}} \log \frac{\pi^2(\rho+1)^2}{6\delta}. \quad (87)$$

551 A simple inductive argument allows to conclude that, with probability at least  $1 - 2\delta$ :

$$Z_t^2 \leq \left( \sqrt{73 \log \det(\lambda^{-1}\tilde{V}_t)} + \sqrt{3} \right) \sqrt{\log \frac{\pi^2(\rho+1)^2}{6\delta}} + \frac{3RK}{\sqrt{\lambda}} \log \frac{\pi^2(\rho+1)^2}{6\delta}. \quad (88)$$

552 Notice that, as requested,  $\beta_t$  is a non-decreasing sequence of  $t$ , since  $\rho$  is non-decreasing with  $t$   
 553 and  $\det(\lambda^{-1}\tilde{V}_t)$  is non-decreasing as well. Indeed, since  $\tilde{V}_t = \tilde{V}_{t-1} + \sigma_{t-1}\phi(\mathbf{x}_{t-1})\phi(\mathbf{x}_{t-1})^\top$ , we  
 554 have that thanks to Weyl's inequality for eigenvalues  $\lambda_i(\tilde{V}_t) \geq \lambda_i(\tilde{V}_{t-1})$  for all  $i \in \mathbb{N}$ , being  $\lambda_i$  the  
 555  $i$ -th eigenvalue [30]. It follows that  $\det(\lambda^{-1}\tilde{V}_t) \geq \det(\lambda^{-1}\tilde{V}_{t-1})$ . Rescaling  $\delta \leftarrow \delta/2$ , we get the  
 556 result.  $\square$

### 557 B.3 Proofs of Section 7

558 **Lemma 7.1** (Good Event). *Let  $t \in \mathbb{N}$ ,  $f \in \mathcal{H}$ , and  $\delta \in (0, 1)$ , define the confidence radius as:*

$$B_t(\delta; f) := \sqrt{\lambda}B + \frac{1}{\mathbf{g}(\tau)} \left( \sqrt{73 \log \det(\lambda^{-1}\tilde{V}_t(\lambda; f))} + \sqrt{3} \right) \sqrt{\log \frac{\pi^2(\rho+1)^2}{3\delta}} + \frac{3RK}{\mathbf{g}(\tau)\sqrt{\lambda}} \log \frac{\pi^2(\rho+1)^2}{3\delta},$$

559 where  $\rho = \max \left\{ 0, \left\lceil \log \left( \frac{8R^2K^2(t-1)^3}{\lambda} \log \left( 1 + \frac{K^2R^2}{\lambda} \right) \right) \right\rceil \right\}$ . Let  $\mathcal{E}_\delta := \{\forall t \geq 1 : f^* \in \mathcal{C}_t(\delta)\}$ .  
 560 Under Assumptions 3.1, 3.2, and 3.3, it holds that  $\Pr(\mathcal{E}_\delta) \geq 1 - \delta$ .

561 *Proof.* First of all, we observe that  $\mathcal{E}_\delta = \left\{ \forall t \geq 1 : \left\| g_t(f^*) - g_t(\hat{f}_t) \right\|_{\tilde{V}_t^{-1}(\lambda; f)} \leq B_t(\delta; f) \right\}$ . Let  
 562  $t \in \mathbb{N}$  and let us define  $\epsilon_t := -y_t + \mu(f^*(\mathbf{x}_t))$ . We have:

$$g_t(f^*) - g_t(\hat{f}_t) \quad (89)$$

$$= \sum_{s=1}^{t-1} \mathbf{g}(\tau)^{-1} \mu(f^*(\mathbf{x}_s)) \phi(\mathbf{x}_s) + \lambda \alpha^* - \sum_{s=1}^{t-1} \mathbf{g}(\tau)^{-1} \mu(\hat{f}_t(\mathbf{x}_s)) \phi(\mathbf{x}_s) - \lambda \hat{\alpha}_t \quad (90)$$

$$= \sum_{s=1}^{t-1} \mathbf{g}(\tau)^{-1} (-y_s + \mu(f^*(\mathbf{x}_s))) \phi(\mathbf{x}_s) + \lambda \alpha^* \quad (91)$$

$$- \underbrace{\left( \sum_{s=1}^{t-1} \mathbf{g}(\tau)^{-1} (-y_s + \mu(\hat{f}_t(\mathbf{x}_s))) \phi(\mathbf{x}_s) + \lambda \hat{\alpha}_t \right)}_{\nabla \mathcal{L}_t(\hat{f}_t)=0} \quad (92)$$

$$= -\mathbf{g}(\tau)^{-1} \sum_{s=1}^{t-1} \epsilon_s \phi(\mathbf{x}_s) + \lambda \alpha^*, \quad (93)$$

563 having exploited the first-order optimality condition for the loss evaluated in the maximum-likelihood  
 564 estimate, i.e.,  $\nabla \mathcal{L}_t(\hat{f}_t) = 0$  and the definition of  $\epsilon_s = y_s - \mu(f^*(\mathbf{x}_s))$ . Now, by computing the norm,



565 we have:

$$\left\| g_t(f^*) - g_t(\hat{f}_t) \right\|_{\tilde{V}_t^{-1}(\lambda; f^*)} \leq \mathfrak{g}(\tau)^{-1} \left\| \sum_{s=1}^{t-1} \epsilon_s \phi(\mathbf{x}_s) \right\|_{\tilde{V}_t^{-1}(\lambda; f^*)} + \lambda \|\alpha^*\|_{\tilde{V}_t^{-1}(\lambda; f^*)}. \quad (94)$$

566 We can immediately bound the second term under Assumption 3.1:

$$\|\alpha^*\|_{\tilde{V}_t^{-1}(\lambda; f^*)}^2 = (\alpha^*)^\top \tilde{V}_t^{-1}(\lambda; f^*) \alpha^* \leq \lambda^{-1} \|\alpha^*\|^2 \leq \lambda^{-1} B^2, \quad (95)$$

567 since  $\tilde{V}_t^{-1}(\lambda; f^*) \succeq \lambda I$ . For the first term, we resort to the self-normalized concentration inequality  
568 of Theorem 6.2, recalling that the variance of the noise is  $\mathbb{V}\text{ar}[\epsilon_s | \mathcal{F}_{s-1}] = \dot{\mu}(f^*(\mathbf{x}_s)) \mathfrak{g}(\tau)^{-1}$ .  $\square$

569 **Theorem 7.2** (Regret Bound of GKB-UCB). *Under Assumptions 3.1, 3.2, 3.3, and 3.4, GKB-UCB  
570 with the confidence radius  $B_t(\delta; f)$  as defined in Lemma 7.1 and  $\lambda > 0$ , for every  $\delta \in (0, 1)$ , with  
571 probability at least  $1 - \delta$ , suffers regret bounded as  $R(\text{GKB-UCB}, T) = R_{\text{perm}}(T) + R_{\text{trans}}(T)$ , where:*

$$R_{\text{perm}}(T) \leq 8(1 + 2R_s BK) \beta_T(\delta; \mathcal{H}) \sqrt{\max\{\mathfrak{g}(\tau), \lambda^{-1} R_{\dot{\mu}} K^2\} \tilde{\gamma}_T(f^*)} \sqrt{\frac{T}{\kappa_*}}, \quad (19)$$

$$R_{\text{trans}}(T) \leq 32R_s(1 + R_{\dot{\mu}} \kappa_{\mathcal{H}})(1 + 2R_s BK)^2 \beta_T(\delta; \mathcal{H})^2 \max\{\mathfrak{g}(\tau), \lambda^{-1} R_{\dot{\mu}} K^2\} \tilde{\gamma}_T(f^*). \quad (20)$$

572 *Proof.* We start by performing a second-order Taylor's expansion of the regret:

$$\begin{aligned} \sum_{t=1}^T (\mu(f^*(\mathbf{x}^*)) - \mu(f^*(\mathbf{x}_t))) &= \underbrace{\sum_{t=1}^T \dot{\mu}(f^*(\mathbf{x}_t)) (f^*(\mathbf{x}^*) - f^*(\mathbf{x}_t))}_{=: R_1(T)} \\ &+ \underbrace{\sum_{t=1}^T \left( \int_{v=0}^1 (1-v) \ddot{\mu}((1-v)f^*(\mathbf{x}_t) + vf^*(\mathbf{x}^*)) dv \right) (f^*(\mathbf{x}^*) - f^*(\mathbf{x}_t))^2}_{=: R_2(T)}. \end{aligned} \quad (96)$$

573 We know that  $\tilde{f}_t \in \mathcal{C}_t(\delta)$  and if the good event  $\mathcal{E}_\delta$  holds, we also have  $f^* \in \mathcal{C}_t(\delta)$ . Using the optimism,  
574 we know that  $\tilde{f}_t(\mathbf{x}_t) \geq f^*(\mathbf{x}^*)$ . We start by analyzing  $R_1(T)$ , recalling that  $\dot{\mu}(f^*(\mathbf{x}_t)) \geq 0$ :

$$R_1(T) = \sum_{t=1}^T \dot{\mu}(f^*(\mathbf{x}_t)) (f^*(\mathbf{x}^*) - f^*(\mathbf{x}_t)) \quad (98)$$

$$= \sum_{t=1}^T \dot{\mu}(f^*(\mathbf{x}_t)) \left( f^*(\mathbf{x}^*) - f^*(\mathbf{x}_t) \pm \tilde{f}_t(\mathbf{x}_t) \right) \quad (99)$$

$$\leq \sum_{t=1}^T \dot{\mu}(f^*(\mathbf{x}_t)) (\tilde{f}_t(\mathbf{x}_t) - f^*(\mathbf{x}_t)) \quad (100)$$

$$= \sum_{t=1}^T \dot{\mu}(f^*(\mathbf{x}_t)) \langle \tilde{\alpha}_t - \alpha^*, \phi(\mathbf{x}_t) \rangle \quad (101)$$

$$\leq \sum_{t=1}^T \dot{\mu}(f^*(\mathbf{x}_t)) \underbrace{\|\tilde{\alpha}_t - \alpha^*\|_{\tilde{V}_t(\lambda; f^*)}}_{(a)} \underbrace{\|\phi(\mathbf{x}_t)\|_{\tilde{V}_t^{-1}(\lambda; f^*)}}_{(b)}, \quad (102)$$

575 where we decompose the functions as inner products and the Cauchy-Schwarz's inequality. For term  
576 (a), we apply Lemma C.4 with  $f \leftarrow \tilde{f}_t, f' \leftarrow f^*, f'' \leftarrow \hat{f}_t$  and exploit the good event:

$$\|\tilde{\alpha}_t - \alpha^*\|_{\tilde{V}_t(\lambda; f^*)} \leq (1 + 2R_s BK) \quad (103)$$

$$\cdot \left( \left\| g_t(\tilde{f}_t) - g_t(\hat{f}_t) \right\|_{\tilde{V}_t^{-1}(\lambda; \tilde{f}_t)} + \left\| g_t(f^*) - g_t(\hat{f}_t) \right\|_{\tilde{V}_t^{-1}(\lambda; f^*)} \right) \quad (104)$$

$$\leq (1 + 2R_s BK)(B_t(\delta; \tilde{f}_t) + B_t(\delta; f^*)) \quad (105)$$

$$\leq 2(1 + 2R_s BK)\beta_T(\delta; \mathcal{H}), \quad (106)$$

577 having observed that  $\beta_T(\delta; \mathcal{H}) \geq \beta_t(\delta; \mathcal{H}) \geq \max\{B_t(\delta; \tilde{f}_t), B_t(\delta; f^*)\}$ . For term (b), we apply  
578 Cauchy-Schwarz's inequality:

$$\sum_{t=1}^T \dot{\mu}(f^*(\mathbf{x}_t)) \|\phi(\mathbf{x}_t)\|_{\tilde{V}_t^{-1}(\lambda; f^*)} \quad (107)$$

$$\leq \sqrt{\mathfrak{g}(\tau)} \sqrt{\sum_{t=1}^T \dot{\mu}(f^*(\mathbf{x}_t))} \sqrt{\sum_{t=1}^T \mathfrak{g}(\tau)^{-1} \dot{\mu}(f^*(\mathbf{x}_t)) \|\phi(\mathbf{x}_t)\|_{\tilde{V}_t^{-1}(\lambda; f^*)}^2}. \quad (108)$$

579 Recalling that  $\mathfrak{g}(\tau)^{-1} \dot{\mu}(f^*(\mathbf{x}_t)) \|\phi(\mathbf{x}_t)\|_{\tilde{V}_t^{-1}(\lambda; f^*)}^2 = \|\tilde{\phi}(\mathbf{x}_t; f^*)\|_{\tilde{V}_t^{-1}(\lambda; f^*)}^2$ , we can apply an elliptic  
580 potential lemma (Lemma C.6 with  $M = \max\{1, \lambda^{-1} \mathfrak{g}(\tau)^{-1} R_{\dot{\mu}} K^2\}$ ), where  $\lambda^{-1} \mathfrak{g}(\tau)^{-1} R_{\dot{\mu}} K^2$  is  
581 a bound to the maximum value  $\|\tilde{\phi}(\mathbf{x}_t; f^*)\|_{\tilde{V}_t^{-1}(\lambda; f^*)}^2$  can take as:

$$\|\tilde{\phi}(\mathbf{x}_t; f^*)\|_{\tilde{V}_t^{-1}(\lambda; f^*)}^2 = \mathfrak{g}(\tau)^{-1} \dot{\mu}(f^*(\mathbf{x}_t)) \|\phi(\mathbf{x}_t)\|_{\tilde{V}_t^{-1}(\lambda; f^*)}^2 \leq \mathfrak{g}(\tau)^{-1} R_{\dot{\mu}} K^2 \lambda^{-1}, \quad (109)$$

582 as  $\tilde{V}_t^{-1}(\lambda; f^*) \succeq \lambda I$ . Thus, we have:

$$\sum_{t=1}^T \|\tilde{\phi}(\mathbf{x}_t; f^*)\|_{\tilde{V}_t^{-1}(f^*)}^2 \leq 2 \max\{1, \lambda^{-1} \mathfrak{g}(\tau)^{-1} R_{\dot{\mu}} K^2\} \log \det(\lambda^{-1} \tilde{V}_t(f^*)) \quad (110)$$

$$\leq 4 \max\{1, \lambda^{-1} \mathfrak{g}(\tau)^{-1} R_{\dot{\mu}} K^2\} \tilde{\gamma}_T(f^*). \quad (111)$$

583 The remaining term can be treated as follows, by means of a Taylor expansion:

$$\sum_{t=1}^T \dot{\mu}(f^*(\mathbf{x}_t)) = \sum_{t=1}^T \dot{\mu}(f^*(\mathbf{x}^*)) + \sum_{t=1}^T \left( \int_{v=0}^1 \ddot{\mu}((1-v)f^*(\mathbf{x}^*) + v f^*(\mathbf{x}_t)) \right) (f^*(\mathbf{x}_t) - f^*(\mathbf{x}^*)) \quad (112)$$

$$\leq T \dot{\mu}(f^*(\mathbf{x}^*)) + R_s \sum_{t=1}^T \left( \int_{v=0}^1 \ddot{\mu}((1-v)f^*(\mathbf{x}^*) + v f^*(\mathbf{x}_t)) \right) (f^*(\mathbf{x}^*) - f^*(\mathbf{x}_t)) \quad (113)$$

$$= \frac{T}{\kappa_*} + R_s \sum_{t=1}^T (\mu(f^*(\mathbf{x}^*)) - \mu(f^*(\mathbf{x}_t))) \quad (114)$$

$$= \frac{T}{\dot{\mu}(f^*(\mathbf{x}^*))} + R_s R(\text{GKB-UCB}, T) \quad (115)$$

$$= \frac{T}{\kappa_*} + R_s R(\text{GKB-UCB}, T). \quad (116)$$

584 where we exploited  $f^*(\mathbf{x}^*) \geq f^*(\mathbf{x}_t)$ , the self-concordance property (Assumption 3.4) and mean-  
585 value theorem. Putting all together, we get:

$$R_1(T) \leq 4\sqrt{\mathfrak{g}(\tau)}(1 + 2R_s BK)\beta_T(\delta; \mathcal{H}) \sqrt{\frac{T}{\kappa_*} + R_s R(\text{GKB-UCB}, T)} \quad (117)$$

$$\cdot \sqrt{\max\{1, \lambda^{-1} \mathfrak{g}(\tau)^{-1} R_{\dot{\mu}} K^2\} \tilde{\gamma}_T(f^*)} \quad (118)$$

586 Let us move to the second term, using optimism and proceeding with the same rationale as before:

$$R_2(T) \leq R_{\dot{\mu}} R_s \sum_{t=1}^T (f^*(\mathbf{x}^*) - f^*(\mathbf{x}_t))^2 \quad (119)$$

$$\leq R_{\dot{\mu}} R_s \sum_{t=1}^T (\tilde{f}_t(\mathbf{x}_t) - f^*(\mathbf{x}_t))^2 \quad (120)$$

$$\leq R_{\dot{\mu}} \sum_{t=1}^T \|\tilde{\alpha}_t - \alpha^*\|_{\tilde{V}_t(\lambda; f^*)}^2 \|\phi(\mathbf{x}_t)\|_{\tilde{V}_t^{-1}(\lambda; f^*)}^2 \quad (121)$$

$$\leq 4R_{\dot{\mu}} R_s (1 + 2R_s B K)^2 \beta_T(\delta; \mathcal{H})^2 \sum_{t=1}^T \|\phi(\mathbf{x}_t)\|_{\tilde{V}_t^{-1}(\lambda; f^*)}^2 \quad (122)$$

$$\leq 4\mathbf{g}(\tau) R_{\dot{\mu}} R_s \kappa_{\mathcal{X}} (1 + 2R_s B K)^2 \beta_T(\delta; \mathcal{H})^2 \sum_{t=1}^T \mathbf{g}(\tau)^{-1} \dot{\mu}(f^*(\mathbf{x}_t)) \|\phi(\mathbf{x}_t)\|_{\tilde{V}_t^{-1}(\lambda; f^*)}^2 \quad (123)$$

$$\leq 4\mathbf{g}(\tau) R_{\dot{\mu}} R_s \kappa_{\mathcal{X}} (1 + 2R_s B K)^2 \beta_T(\delta; \mathcal{H})^2 \sum_{t=1}^T \|\tilde{\phi}(\mathbf{x}_t; f^*)\|_{\tilde{V}_t^{-1}(\lambda; f^*)}^2 \quad (124)$$

$$\leq 16\mathbf{g}(\tau) R_{\dot{\mu}} R_s \kappa_{\mathcal{X}} (1 + 2R_s B K)^2 \beta_T(\delta; \mathcal{H})^2 \max\{1, \lambda^{-1} \mathbf{g}(\tau)^{-1} R_{\dot{\mu}} K^2\} \tilde{\gamma}_T(f^*), \quad (125)$$

587 having, in addition, exploited the fact that  $\kappa_{\mathcal{X}} \geq \dot{\mu}(f^*(\mathbf{x}_t))^{-1}$ . Putting all together, we have:

$$R(\text{GKB-UCB}, T) = R_1(T) + R_2(T) \quad (126)$$

$$\leq 4\sqrt{\mathbf{g}(\tau)} (1 + 2R_s B K) \beta_T(\delta; \mathcal{H}) \sqrt{\max\{1, \lambda^{-1} \mathbf{g}(\tau)^{-1} R_{\dot{\mu}} K^2\} \tilde{\gamma}_T(f^*)} \quad (127)$$

$$\cdot \left( \sqrt{\frac{T}{\kappa_*}} + \sqrt{R_s R(\text{GKB-UCB}, T)} \right) + R_2(T). \quad (128)$$

588 Using the polynomial inequality of Proposition 7 of [2] (i.e.,  $x^2 \leq bx + c = 0 \implies x \leq b + \sqrt{c}$   
589 when  $b, c \geq 0$ ), we have:

$$\sqrt{R(\text{GKB-UCB}, T)} \leq 4\sqrt{\mathbf{g}(\tau)} (1 + 2R_s B K) \beta_T(\delta; \mathcal{H}) \sqrt{\max\{1, \lambda^{-1} \mathbf{g}(\tau)^{-1} R_{\dot{\mu}} K^2\} \tilde{\gamma}_T(f^*)} \sqrt{R_s} \quad (129)$$

$$+ \sqrt{4\sqrt{\mathbf{g}(\tau)} (1 + 2R_s B K) \beta_T(\delta; \mathcal{H}) \sqrt{\max\{1, \lambda^{-1} \mathbf{g}(\tau)^{-1} R_{\dot{\mu}} K^2\} \tilde{\gamma}_T(f^*)} \sqrt{\frac{T}{\kappa_*}} + R_2(T)}. \quad (130)$$

590 Squaring both sides and bounding the square as  $(a + b)^2 \leq 2a^2 + 2b^2$ , we obtain:

$$R(\text{GKB-UCB}, T) \quad (131)$$

$$\leq 2 \left( 4\sqrt{\mathbf{g}(\tau)} (1 + 2R_s B K) \beta_T(\delta; \mathcal{H}) \sqrt{\max\{1, \lambda^{-1} \mathbf{g}(\tau)^{-1} R_{\dot{\mu}} K^2\} \tilde{\gamma}_T(f^*)} \sqrt{R_s} \right)^2 \quad (132)$$

$$+ 2 \left( 4\sqrt{\mathbf{g}(\tau)} (1 + 2R_s B K) \beta_T(\delta; \mathcal{H}) \sqrt{\max\{1, \lambda^{-1} \mathbf{g}(\tau)^{-1} R_{\dot{\mu}} K^2\} \tilde{\gamma}_T(f^*)} \sqrt{\frac{T}{\kappa_*}} + R_2(T) \right) \quad (133)$$

$$\leq 8\sqrt{\mathbf{g}(\tau)} (1 + 2R_s B K) \beta_T(\delta; \mathcal{H}) \sqrt{\max\{1, \lambda^{-1} \mathbf{g}(\tau)^{-1} R_{\dot{\mu}} K^2\} \tilde{\gamma}_T(f^*)} \sqrt{\frac{T}{\kappa_*}} \quad (134)$$

$$+ 32R_s (1 + R_{\dot{\mu}} \kappa_{\mathcal{X}}) \mathbf{g}(\tau) (1 + 2R_s B K)^2 \beta_T(\delta; \mathcal{H})^2 \max\{1, \lambda^{-1} \mathbf{g}(\tau)^{-1} R_{\dot{\mu}} K^2\} \tilde{\gamma}_T(f^*). \quad (135)$$

591 We get the result by defining  $R_{\text{perm}}(T)$  and  $R_{\text{trans}}(T)$  as in the statement.  $\square$

## 592 B.4 Proofs of Appendix A

593 **Lemma B.2** (Confidence Set). *Let  $t \in \mathbb{N}$ ,  $f \in \mathcal{H}$ , and  $\delta \in (0, 1)$ . Then, it holds that  $\mathcal{C}_t(\delta) \subseteq \mathcal{D}_t(\delta)$ .  
594 Furthermore, under the good event  $\mathcal{E}_\delta$ , for every  $f = \langle \alpha, \phi \rangle \in \mathcal{D}_t(\delta)$ , we have:*

$$\|\alpha - \alpha^*\|_{\tilde{V}_t(\lambda; f^*)} \leq (2 + 2R_s BK) \sqrt{\beta_t(\delta; \mathcal{H})} \left( \sqrt{\beta_t(\delta; \mathcal{H})} + \sqrt{2} \right). \quad (136)$$

595 *Proof.* Following the same derivation of Lemma 2 of [2], based on Taylor's expansion and using the  
596 definitions of  $G_t$  and  $\tilde{G}_t$  in Appendix C. We have:

$$\mathcal{L}_t(f) - \mathcal{L}_t(\hat{f}_t) \quad (137)$$

$$= (\alpha - \hat{\alpha}_t)^\top \underbrace{\nabla \mathcal{L}_t(\hat{f}_t)}_{=0} + (\alpha - \hat{\alpha}_t)^\top \left( \int_{v=0}^1 (1-v) \tilde{V}_t(\lambda; \hat{f}_t + v(f - \hat{f}_t)) dv \right) (\alpha - \hat{\alpha}_t) \quad (138)$$

$$= \|\alpha - \hat{\alpha}_t\|_{\tilde{G}_t(\hat{f}_t, f)}^2 \quad (139)$$

$$\leq \|\alpha - \hat{\alpha}_t\|_{G_t(\hat{f}_t, f)}^2 \quad (140)$$

$$= \|g_t(f) - g_t(\hat{f}_t)\|_{\tilde{G}_t^{-1}(\hat{f}_t, f)}^2 \quad (141)$$

$$\leq (1 + 2R_s BK) \|g_t(f) - g_t(\hat{f}_t)\|_{\tilde{V}_t^{-1}(\lambda; f)}, \quad (142)$$

597 where we used Equation (162) and (167). Thus, let  $f \in \mathcal{C}_t(\delta)$ , we have that  
598  $\|g_t(f) - g_t(\hat{f}_t)\|_{\tilde{V}_t^{-1}(\lambda; f)} \leq B_t(\delta; f) \leq B_t(\delta; \mathcal{H})$  and, consequently,  $f \in \mathcal{D}_t(\delta)$ .

599 For the second part, suppose the good event  $\mathcal{E}_\delta$  holds and consider  $f \in \mathcal{D}_t(\delta)$ , we have via Taylor's  
600 expansion:

$$\mathcal{L}_t(f) - \mathcal{L}_t(f^*) \quad (143)$$

$$= (\alpha - \alpha^*)^\top \nabla \mathcal{L}_t(f^*) + (\alpha - \alpha^*)^\top \left( \int_{v=0}^1 (1-v) \tilde{V}_t(f^* + v(f - f^*); \lambda) dv \right) (\alpha - \alpha^*) \quad (144)$$

$$= (\alpha - \alpha^*)^\top \nabla \mathcal{L}_t(f^*) + \|\alpha - \alpha^*\|_{\tilde{G}_t(f^*, f)}^2 \quad (145)$$

$$\geq (\alpha - \alpha^*)^\top \nabla \mathcal{L}_t(f^*) + (2 + 2R_s BK)^{-1} \|\alpha - \alpha^*\|_{\tilde{V}_t(\lambda; f^*)}^2, \quad (146)$$

601 where we used Equation (168). Thus, we have:

$$\|\alpha - \alpha^*\|_{\tilde{V}_t(f^*; \lambda)}^2 \quad (147)$$

$$\leq (2 + 2R_s BK)(\mathcal{L}_t(f) - \mathcal{L}_t(f^*)) + (2 + 2R_s BK)(\alpha - \alpha^*)^\top \nabla \mathcal{L}_t(f^*) \quad (148)$$

$$\leq (2 + 2R_s BK)(\mathcal{L}_t(f) - \mathcal{L}_t(\hat{f}_t)) + (2 + 2R_s BK)(\mathcal{L}_t(f^*) - \mathcal{L}_t(\hat{f}_t)) \quad (149)$$

$$+ (2 + 2R_s BK) \|\alpha - \alpha^*\|_{\tilde{V}_t(\lambda; f^*)} \|\nabla \mathcal{L}_t(f^*)\|_{\tilde{V}_t^{-1}(\lambda; f^*)} \quad (150)$$

$$\leq 2(2 + 2R_s BK)(1 + 2R_s BK) B_t(\delta; \mathcal{H}) + (2 + 2R_s BK) \|\alpha - \alpha^*\|_{\tilde{V}_t(\lambda; f^*)} B_t(\delta; f^*). \quad (151)$$

602 where we used the fact that  $\mathcal{L}_t(f) \geq \mathcal{L}_t(\hat{f}_t) \wedge \mathcal{L}_t(f^*) \geq \mathcal{L}_t(\hat{f}_t)$ , that  $f^* \in \mathcal{C}_t(\delta) \subseteq \mathcal{D}_t(\delta)$  under the  
603 good event and  $f \in \mathcal{D}_t(\delta)$ , and that:

$$\|\nabla \mathcal{L}_t(f^*)\|_{\tilde{V}_t^{-1}(\lambda; f^*)} = \|g_t(f^*) - g_t(\hat{f}_t)\|_{\tilde{V}_t^{-1}(\lambda; f^*)} \leq B_t(\delta; f^*). \quad (152)$$

604 holding under the good event. By the choice of confidence radius and bounding  $B_t(\delta; f^*) \leq$   
 605  $B_t(\delta; \mathcal{H}) \leq \beta_t(\delta; \mathcal{H})$ , we have the second-degree inequality:

$$\|\alpha - \alpha^*\|_{\tilde{V}_t(\lambda; f^*)}^2 \leq 2(2 + 2R_s BK)(1 + 2R_s BK)\beta_t(\delta; \mathcal{H}) \quad (153)$$

$$+ (2 + 2R_s BK)\|\alpha - \alpha^*\|_{\tilde{V}_t(\lambda; f^*)}\beta_t(\delta; \mathcal{H}). \quad (154)$$

606 Using the polynomial inequality of Proposition 7 of [2] (i.e.,  $x^2 \leq bx + c = 0 \implies x \leq b + \sqrt{c}$   
 607 when  $b, c \geq 0$ ), we have:

$$\|\alpha - \alpha^*\|_{\tilde{V}_t(\lambda; f^*)} \leq \sqrt{2(2 + 2R_s BK)(1 + 2R_s BK)\beta_t(\delta; \mathcal{H})} + (2 + 2R_s BK)\beta_t(\delta; \mathcal{H}) \quad (155)$$

$$\leq (2 + 2R_s BK)\sqrt{\beta_t(\delta; \mathcal{H})} \left( \sqrt{\beta_t(\delta; \mathcal{H})} + \sqrt{2} \right). \quad (156)$$

608 having bounded  $1 + 2R_s BK \leq 2 + 2R_s BK$ .  $\square$

609 **Theorem A.1** (Regret Bound of Eff-GKB-UCB). *Under Assumptions 3.1, 3.2, 3.3, and 3.4, GKB-UCB*  
 610 *with confidence radius  $(1 + 2R_s BK)B_t(\delta; \mathcal{H})$  and  $\lambda > 0$ , for every  $\delta \in (0, 1)$ , with probability at*  
 611 *least  $1 - \delta$ , suffers regret bounded as:  $R(\text{Eff-GKB-UCB}, T) = R_{\text{perm}}(T) + R_{\text{trans}}(T)$ , where:*

$$R_{\text{perm}}(T) \leq 4\sqrt{\max\{\mathfrak{g}(\tau), \lambda^{-1}R_{\mu}K^2\}}(2 + 2R_s BK)\sqrt{\beta_T(\delta; \mathcal{H})} \left( \sqrt{\beta_T(\delta; \mathcal{H})} + 2 \right) \sqrt{\tilde{\gamma}_T(f^*)} \sqrt{\frac{T}{\kappa_*}},$$

$$R_{\text{trans}}(T) \leq 8R_s(1 + R_{\mu}\kappa_{\mathcal{X}}) \max\{\mathfrak{g}(\tau), \lambda^{-1}R_{\mu}K^2\} (2 + 2R_s BK)^2 \beta_T(\delta; \mathcal{H}) \left( \sqrt{\beta_T(\delta; \mathcal{H})} + 2 \right)^2 \tilde{\gamma}_T(f^*).$$

612 *Proof.* The proof follows the same steps as Theorem 7.2, with the only difference that we exploit the  
 613 bound of Lemma B.2:

$$\|\alpha - \alpha^*\|_{\tilde{V}_t(\lambda; f^*)} \leq (2 + 2R_s BK)\sqrt{\beta_t(\delta; \mathcal{H})} \left( \sqrt{\beta_t(\delta; \mathcal{H})} + \sqrt{2} \right). \quad (157)$$

614  $\square$

## 615 C Technical Lemmas

616 In this section, we introduce some technical concepts and lemmas to be used in the analysis. We  
 617 consider  $\mathbf{x} \in \mathcal{X}$  and  $f = \langle \alpha, \phi \rangle, f' = \langle \alpha', \phi \rangle \in \mathcal{H}$ , we define the following quantities, analogous to  
 618 those of [2]:

$$\xi(\mathbf{x}, f, f') := \int_{v=0}^1 \dot{\mu}((1-v)f(\mathbf{x}) + vf'(\mathbf{x}))dv, \quad (158)$$

$$\tilde{\xi}(\mathbf{x}, f, f') := \int_{v=0}^1 (1-v)\dot{\mu}((1-v)f(\mathbf{x}) + vf'(\mathbf{x}))dv, \quad (159)$$

$$G_t(f, f') := \sum_{s=1}^{t-1} \frac{\xi(\mathbf{x}_s, f, f')}{\mathfrak{g}(\tau)} \phi(\mathbf{x}_s)\phi(\mathbf{x}_s)^\top + \lambda I, \quad (160)$$

$$\tilde{G}_t(f, f') := \sum_{s=1}^{t-1} \frac{\tilde{\xi}(\mathbf{x}_s, f, f')}{\mathfrak{g}(\tau)} \phi(\mathbf{x}_s)\phi(\mathbf{x}_s)^\top + \lambda I. \quad (161)$$

619 We have that  $\xi(\mathbf{x}, f, f') \geq \tilde{\xi}(\mathbf{x}, f, f')$  and, consequently, we have that  $G_t(f, f') \succeq \tilde{G}_t(f, f')$ .  
 620 Thanks to the mean-value theorem and the definition of function  $g_t(f)$ , we have that:

$$g_t(f) - g_t(f') = G_t(f, f')(\alpha - \alpha'). \quad (162)$$

621 Using Assumption 3.4, we can easily extend Lemmas 7 and 8 of [2].

622 **Lemma C.1** (Extension of Lemma 7 of [2]). *Let  $\mathcal{Z} \subset \mathbb{R}$  be any bounded interval of  $\mathbb{R}$  and let*  
 623  *$f : \mathcal{Z} \rightarrow \mathbb{R}$  be a monotonically non-decreasing function such that  $|\dot{f}| \leq R_s \dot{f}$ . Then, for every*

624  $z_1, z_2 \in \mathcal{Z}$ :

$$\int_{v=0}^1 \dot{f}(z_1 + v(z_2 - z_1))dv \geq \frac{\dot{f}(z)}{1 + R_s|z_1 - z_2|}, \quad \forall z \in \{z_1, z_2\}. \quad (163)$$

625 *Proof.* Immediately follows from the same steps of [2, Lemma 7].  $\square$

626 **Lemma C.2** (Extension of Lemma 8 of [2]). *Let  $\mathcal{Z} \subset \mathbb{R}$  be any bounded interval of  $\mathbb{R}$  and let*  
 627  *$f : \mathcal{Z} \rightarrow \mathbb{R}$  be a monotonically non-decreasing function such that  $|\ddot{f}| \leq R_s \dot{f}$ . Then, for every*  
 628  *$z_1, z_2 \in \mathcal{Z}$ :*

$$\int_{v=0}^1 (1-v)\dot{f}(z_1 + v(z_2 - z_1))dv \geq \frac{\dot{f}(z_1)}{2 + R_s|z_1 - z_2|}. \quad (164)$$

629 *Proof.* See [17, Lemma D.1].  $\square$

630 From Lemma C.1 and Lemma C.2, we immediatly have:

$$\xi(\mathbf{x}, f, f') := \int_{v=0}^1 \dot{\mu}((1-v)f(\mathbf{x}) + vf'(\mathbf{x}))dv \geq \frac{\dot{\mu}(\bar{f})}{1 + R_s|f(\mathbf{x}) - f'(\mathbf{x})|}, \quad \text{for } \bar{f} \in \{f(\mathbf{x}), f'(\mathbf{x})\}. \quad (165)$$

631

$$\tilde{\xi}(\mathbf{x}, f, f') := \int_{v=0}^1 (1-v)\dot{\mu}((1-v)f(\mathbf{x}) + vf'(\mathbf{x}))dv \geq \frac{\dot{\mu}(f(\mathbf{x}))}{2 + R_s|f(\mathbf{x}) - f'(\mathbf{x})|}. \quad (166)$$

632 Moreover, under Assumptions 3.2 and 3.1, we have that  $|f(\mathbf{x}) - f'(\mathbf{x})| \leq 2\|f\|_\infty \leq 2BK$ . This  
 633 allows us to write:

$$G_t(f, f') \succeq (1 + 2R_sBK)^{-1}\tilde{V}_t(\lambda; \bar{f}), \quad \text{for } \bar{f} \in \{f, f'\}, \quad (167)$$

$$\tilde{G}_t(f, f') \succeq (2 + 2R_sBK)^{-1}\tilde{V}_t(\lambda; f). \quad (168)$$

634 **Lemma C.3.** *Let  $f \in \mathcal{H}$ ,  $\tilde{V}_t(\lambda; f)$  and  $V_t(\lambda)$  defined as in the main paper. The following semidefinite*  
 635 *inequalities holds:*

$$\min\{1, \mathbf{g}(\tau)R_\mu^{-1}\}\tilde{V}_t(\lambda; f) \preceq V_t(\lambda) \preceq \max\{1, \mathbf{g}(\tau)\kappa_{\mathcal{X}}(f)\}\tilde{V}_t(\lambda; f), \quad (169)$$

636 where  $\kappa_{\mathcal{X}}(f) = \sup_{\mathbf{x} \in \mathcal{X}} \frac{1}{\mu(f(\mathbf{x}))}$

637 *Proof.* For one inequality, we have:

$$\tilde{V}_t(\lambda; f) = \sum_{s=1}^{t-1} \frac{\dot{\mu}(f(\mathbf{x}_s))}{\mathbf{g}(\tau)} \phi(\mathbf{x})\phi(\mathbf{x})^\top + \lambda I \quad (170)$$

$$\succeq \mathbf{g}(\tau)^{-1}\kappa_{\mathcal{X}}(f)^{-1} \sum_{s=1}^{t-1} \phi(\mathbf{x})\phi(\mathbf{x})^\top + \lambda I \quad (171)$$

$$\succeq \min\{1, \mathbf{g}(\tau)^{-1}\kappa_{\mathcal{X}}(f)^{-1}\} \left( \sum_{s=1}^{t-1} \phi(\mathbf{x})\phi(\mathbf{x})^\top + \lambda I \right) \quad (172)$$

$$= \min\{1, \mathbf{g}(\tau)^{-1}\kappa_{\mathcal{X}}(f)^{-1}\} V_t(\lambda). \quad (173)$$

638 For the other inequality, we have:

$$\tilde{V}_t(\lambda; f) = \sum_{s=1}^{t-1} \frac{\dot{\mu}(f(\mathbf{x}_s))}{\mathbf{g}(\tau)} \phi(\mathbf{x})\phi(\mathbf{x})^\top + \lambda I \quad (174)$$

$$\preceq \mathbf{g}(\tau)^{-1} R_{\dot{\mu}} \sum_{s=1}^{t-1} \phi(\mathbf{x}) \phi(\mathbf{x})^\top + \lambda I \quad (175)$$

$$\preceq \max \{1, \mathbf{g}(\tau)^{-1} R_{\dot{\mu}}\} \left( \sum_{s=1}^{t-1} \phi(\mathbf{x}) \phi(\mathbf{x})^\top + \lambda I \right) \quad (176)$$

$$= \max \{1, \mathbf{g}(\tau)^{-1} R_{\dot{\mu}}\} V_t(\lambda). \quad (177)$$

639

□

640 **Lemma C.4.** *Let  $f = \langle \alpha, \phi \rangle, f' = \langle \alpha', \phi \rangle \in \mathcal{H}$ , then for every  $f'' = \langle \alpha'', \phi \rangle \in \mathcal{H}$ , it holds that:*

$$641 \quad \bullet \quad \|\alpha - \alpha'\|_{\tilde{V}_t(\lambda; f')} \leq (1 + 2R_s BK) \left( \|g_t(f) - g_t(f'')\|_{\tilde{V}_t^{-1}(\lambda; f)} + \|g_t(f') - g_t(f'')\|_{\tilde{V}_t^{-1}(\lambda; f')} \right);$$

$$642 \quad \bullet \quad \|\alpha - \alpha'\|_{V_t(\lambda)} \leq (1 + 2R_s BK) \max\{1, \mathbf{g}(\tau) \kappa_{\mathcal{X}}(f')\} \cdot$$

$$643 \quad \cdot \left( \|g_t(f) - g_t(f'')\|_{V_t^{-1}(\lambda)} + \|g_t(f') - g_t(f'')\|_{V_t^{-1}(\lambda)} \right).$$

644 *Proof.* From the mean-value theorem (Equation 162), we have:

$$g_t(f) - g_t(f') = G_t(f, f')(\alpha - \alpha'). \quad (178)$$

645 The first statement follows the same derivation of Proposition 4 of [2], with the only care of applying  
646 Equation (167). The second statement starts from the following intermediate passage of the proof of  
647 Proposition 4 of [2]:

$$\|\alpha - \alpha'\|_{\tilde{V}_t(\lambda; f')} \leq \sqrt{1 + 2R_s BK} \left( \|g_t(f) - g_t(f'')\|_{G_t^{-1}(f, f')} + \|g_t(f') - g_t(f'')\|_{G_t^{-1}(f, f')} \right) \quad (179)$$

$$\leq (1 + 2R_s BK) \left( \|g_t(f) - g_t(f'')\|_{\tilde{V}_t^{-1}(\lambda; f')} + \|g_t(f') - g_t(f'')\|_{\tilde{V}_t^{-1}(\lambda; f')} \right). \quad (180)$$

648 Then, we use the semidefinite inequality  $\tilde{V}_t(\lambda; f') \succeq \max\{1, \mathbf{g}(\tau) \kappa_{\mathcal{X}}(f')\}^{-1} V_t(\lambda)$  (Lemma C.3):

$$\|\alpha - \alpha'\|_{\tilde{V}_t(\lambda; f')} \geq \max\{1, \mathbf{g}(\tau) \kappa_{\mathcal{X}}(f')\}^{-1/2} V_t \|\alpha - \alpha'\|_{V_t(\lambda)} \quad (181)$$

$$\|g_t(f) - g_t(f'')\|_{\tilde{V}_t^{-1}(\lambda; f')} \leq \max\{1, \mathbf{g}(\tau) \kappa_{\mathcal{X}}(f')\}^{1/2} \|g_t(f) - g_t(f'')\|_{V_t^{-1}(\lambda)}. \quad (182)$$

649

□

650 **Lemma C.5.** *Let  $t \in \mathbb{N}$ ,  $f \in \mathcal{H}$ ,  $\mathbf{K}_t$  and  $\tilde{\mathbf{K}}_t(f)$  defined as in the main paper. It holds that:*

$$\log \det(\mathbf{I}_t + \lambda^{-1} \tilde{\mathbf{K}}_t(f)) \leq \log \det(\mathbf{I}_t + \lambda^{-1} R_{\dot{\mu}} \mathbf{g}(\tau)^{-1} \mathbf{K}_t) \quad (183)$$

$$\leq \max\{1, R_{\dot{\mu}} \mathbf{g}(\tau)^{-1}\} \log \det(\mathbf{I}_t + \lambda^{-1} \mathbf{K}_t). \quad (184)$$

651 *Proof.* We can look at matrix  $\tilde{\mathbf{K}}_t(f)$  as follows:

$$\tilde{\mathbf{K}}_t(f) = \mathbf{g}(\tau)^{-1} \mathbf{M}(f)^{1/2} \mathbf{K}_t \mathbf{M}(f)^{1/2}, \quad (185)$$

652 where  $\mathbf{M}(f) = \text{diag}((\dot{\mu}(f(\mathbf{x}_s)))_{s \in \llbracket t-1 \rrbracket})$  is a diagonal matrix. Using Horn's inequality for eigenval-  
653 ues [34], we have that for every  $i \in \llbracket t-1 \rrbracket$ :

$$\lambda_i(\tilde{\mathbf{K}}_t(f)) \leq \lambda_i(\mathbf{K}_t) \max_{s \in \llbracket t-1 \rrbracket} \dot{\mu}(f(\mathbf{x}_s)) \mathbf{g}(\tau)^{-1} \leq \lambda_i(\mathbf{K}_t) R_{\dot{\mu}} \mathbf{g}(\tau)^{-1}. \quad (186)$$

654 Furthermore, using Weyl's inequality for eigenvalues, we have for  $i \in \llbracket t-1 \rrbracket$ :

$$\lambda_i(\mathbf{I}_t + \lambda^{-1} \tilde{\mathbf{K}}_t(f)) \leq 1 + \lambda^{-1} \lambda_i(\tilde{\mathbf{K}}_t(f)) \quad (187)$$

$$\leq 1 + \lambda^{-1} R_{\dot{\mu}} \mathbf{g}(\tau)^{-1} \lambda_i(\mathbf{K}_t) \quad (188)$$

$$\leq 1 + \lambda^{-1} \max\{1, R_{\hat{\mu}} \mathbf{g}(\tau)^{-1}\} \lambda_i(\mathbf{K}_t) \quad (189)$$

$$\leq (1 + \lambda^{-1} \lambda_i(\mathbf{K}_t))^{\max\{1, R_{\hat{\mu}} \mathbf{g}(\tau)^{-1}\}} \quad (190)$$

$$\leq \lambda_i(1 + \lambda^{-1} \mathbf{K}_t)^{\max\{1, R_{\hat{\mu}} \mathbf{g}(\tau)^{-1}\}}, \quad (191)$$

655 where we exploited the inequality  $1 + ab \leq (1 + b)^a$  for  $b \geq 0$  and  $a \geq 1$ . The statement is obtained  
656 passing to the determinant and to its logarithm.  $\square$

657 **Lemma C.6** (Elliptic Potential Lemma (slightly extended)). *Let  $(y_t)_{t \geq 1}$  be a sequence, let  $M \geq 1$ ,  
658 and  $V_t(\lambda) = \sum_{s=1}^{t-1} y_s y_s^\top + \lambda I$ . For every  $T \geq 1$ , it holds that:*

$$\sum_{t=1}^T \min\{M, \|y_t\|_{V_t^{-1}(\lambda)}\}^2 \leq 2M \log \det(\lambda^{-1} V_t(\lambda)). \quad (192)$$

659 *Proof.* We follow the steps of Lemma 12 of [2]. Using the inequality  $\min\{1, u\} \leq 2 \log(1 + u)$  for  
660 every  $u \geq 0$ , we have:

$$\sum_{t=1}^T \min\{M, \|y_t\|_{V_t^{-1}(\lambda)}^2\} = M \sum_{t=1}^T \min\{1, M^{-1} \|y_t\|_{V_t^{-1}(\lambda)}^2\} \quad (193)$$

$$\leq 2M \sum_{t=1}^T \log \left( 1 + M^{-1} \|y_t\|_{V_t^{-1}(\lambda)}^2 \right) \quad (194)$$

$$\leq 2M \sum_{t=1}^T \log \left( 1 + \|y_t\|_{V_t^{-1}(\lambda)}^2 \right), \quad (195)$$

661 having exploited that  $M \geq 1$ . Now the last equation can be bounded following the usual steps of [2],  
662 to obtain:

$$\sum_{t=1}^T \log \left( 1 + \|y_t\|_{V_t^{-1}(\lambda)}^2 \right) \leq \log \det(\lambda^{-1} V_t(\lambda)). \quad (196)$$

663  $\square$

664 **Lemma C.7.** *Let  $S_t$  and  $\tilde{V}_t(\lambda)$  defined as in Theorem 6.2. The following inequalities hold:*

$$\|S_t\|_{\tilde{V}_t^{-1}(\lambda)}^2 \leq \frac{(t-1)^2 K^2 R^2}{\lambda}, \quad \log \det(\lambda^{-1} \tilde{V}_t(\lambda)) \leq (t-1) \log \left( 1 + \frac{K^2 R^2}{\lambda} \right). \quad (197)$$

665 *Proof.* For the first inequality, we proceed as follows:

$$\|S_t\|_{\tilde{V}_t^{-1}(\lambda)}^2 \leq \|S_t\|_{\lambda^{-1} I}^2 \leq \lambda^{-1} \left( \sum_{s=1}^{t-1} \|\epsilon_s\| \|\phi(\mathbf{x}_s)\| \right)^2 \leq \frac{(t-1)^2 K^2 R^2}{\lambda}. \quad (198)$$

666 For the second inequality, we proceed as follows:

$$\det(\lambda^{-1} \tilde{V}_t(\lambda)) = \lambda^{-(t-1)} \det(\tilde{\mathbf{K}}_t(\lambda)) \quad (199)$$

$$\leq \lambda^{-(t-1)} \left( \frac{1}{t-1} \text{tr}(\tilde{\mathbf{K}}_t(\lambda)) \right)^{t-1} \quad (200)$$

$$\leq \lambda^{-(t-1)} (\lambda + K^2 R^2)^{(t-1)} \quad (201)$$

$$= \left( 1 + \frac{K^2 R^2}{\lambda} \right)^{(t-1)}. \quad (202)$$



667 having applied the identity of Equation (1), the determinant-trace inequality and bounded  
 668  $\text{tr}(\tilde{\mathbf{K}}_t(\lambda)) \leq (t-1)(\lambda + K^2 R^2)$ , since the diagonal elements of  $\tilde{\mathbf{K}}_t(\lambda)$  are of the form  
 669  $\lambda + \sigma(\mathbf{x})k(\mathbf{x}, \mathbf{x}')\sigma(\mathbf{x}') \leq \lambda + R^2 K^2$ , being the variance bounded by the square of the range.  $\square$
